# Supplementary material for: Genome-wide SNP data unveils the globalization of domesticated pigs
Source: Genet Sel Evol. 2017 Sep 21;49:71. doi: 10.1186/s12711-017-0345-y (PMC5609043; doi:10.1186/s12711-017-0345-y)
Supplement: Supplementary file 1 — Additional file 1: Table S1. Detailed information and parameters of population genetics for pig populations in this study. [file 12711_2017_345_MOESM1_ESM.xlsx]

## Sheet: TableS1
Table S1 Detailed information and parameters of population genetics for pig populations in this study.
Abbriviation	Full name	Longitiude	Latitude	r2=0.3 (kb)	Ne	Total length of ROH (Mb)	FROH (ROH inbreeding coefficient)	Number of individuals	Male	Female	Year of sampling
KPWB	Korea_WildBoar	127.9	36.6	-	-	150.021	0.0578406	5	0	5		Asian_Wild
RUWB1	Russia_WildBoar	99	62.3	48.7953	42.5741	5.9778	0.00230474	10	9	1	2010
RUWB2	Russia_Wildboar_East	136.6	47.1	38.6684	43.8487	17.0031	0.00655553	11	7	4	2011
CNWB2	China_Northern_WildBoar	NA	NA	-	-	25.5498	0.0098507	4	3	1	2010
CNWB1	China_Southern_WildBoar	NA	NA	-	-	25.2578	0.00973815	5	2	3	2010
CNWB3	China_Nanchang_WildBoar	115.9	28.7	19.607	57.7588	25.2032	0.00971707	15	7	8	2011
CNWB4	China_Shangyou_WildBoar	114.6	25.8	-	-	24.9527	0.00962051	4	2	2	2011
THWB	Thailand_Mae_Sariang_WildBoar	97.9	18.1	-	-	294.315	0.113473	5	4	1	2010
CNXZ	China_GongbujiangdaZang	93.2	30	83.9898	46.9201	135.449	0.0522224	20	13	7	2001	Asian_Domestic
CNDQ	China_DiqingZang	99.7	27.8	30.7055	57.7314	37.3201	0.0143888	19	18	1	2001
CNLZ	China_LitangZang	100.3	30	47.8877	50.5814	100.641	0.038802	16	14	2	2001
CNNJ	China_Neijiang	104.9	29.8	95.9027	51.1954	120.345	0.0463989	16	8	8	2001
CNML	China_MilinZang	94.2	29.2	36.7289	53.9902	22.7841	0.0087844	16	14	2	2001
CNMG	China_Mingguangxiaoer	98.5	25	47.8658	46.5942	24.5541	0.00946684	16	16	0	2001
CNGS	China_GansuZang	103.1	35	60.9453	49.9004	41.8597	0.016139	20	10	10	2001
CNKL	China_Kele	104.6	27.1	86.3542	38.7743	11.428	0.00440607	10	4	6	2001
CNRC	China_Rongchang	106.2	29.6	49.604	50.4566	90.5802	0.0349231	20	0	20	2001
CNZA	China_Zang	103.7	34.8	28.8947	52.4546	20.8827	0.00805131	19	9	10	2001
CNGU	China_Guanling	105.6	25.9	72.1191	43.6251	40.392	0.0155731	18	1	17	2001
CNBM	China_Bamei	107.6	35.7	109.835	40.9154	125.509	0.04839	16	11	5	2001
CNTC	China_Tongcheng	113.8	29.2	42.2779	53.3157	35.1459	0.0135505	16	1	15	2001
CNSZ	China_Shaziling	112.9	27.9	222.438	26.1773	26.299	0.0101396	11	7	4	2001
CNGX	China_Ganxiliangtouwu	114.9	28.2	343.455	34.3152	209.492	0.0807694	13	8	5	2001
CNHT	China_Hetaodaer	107.4	40.8	94.2424	40.4882	103.169	0.0397767	16	7	9	2001
CNMZ	China_Minzhu	126.3	46.3	238.193	42.9443	179.776	0.0693125	20	14	6	2001
CNLH	China_Laiwuhei	117.7	36.2	183.267	49.1725	225.106	0.0867893	18	16	2	2001
CNMS	China_Meishan	121.1	31.5	178.164	43.4625	293.943	0.11333	20	8	12	1999
CNJH	China_Jinhua	119.7	29.1	217.262	55.3809	244.774	0.0943724	20	15	5	1999
CNWN	China_Wannan_Spotted	117.9	29.9	140.704	44.4538	194.227	0.074884	18	0	18	2001
CNLP	China_Leping_Spotted	117.2	29	68.2581	55.5903	103.658	0.0399653	20	1	19	1997
CNJQ	China_Jiangquhai	119.9	32.5	178.134	37.22	99.3534	0.0383057	11	2	9	2001
CNEH	China_Erhualian	119.9	31.7	61.2331	55.4492	98.0124	0.0377886	20	0	20	2001
CNLU	China_Luchuan	110.3	22.3	94.7285	53.9819	90.6111	0.0349351	18	0	18	2001
CNDH	China_Guangdongdahuabai	113.4	22.5	287.713	33.8745	205.014	0.079043	16	12	4	2001
CNBX	China_Bamaxiang	107.3	24.2	54.5598	48.1939	58.966	0.0227343	16	0	16	2001
CNWZ	China_Wuzhishan	109.5	18.8	28.7351	54.2654	17.1483	0.00661154	16	5	11	2001
CNDN	China_Diannanxiaoer	101.3	21.3	114.945	39.617	180.716	0.0696751	13	11	2	2001
CNDS	China_Dongshan	111.1	25.9	170.206	43.5192	93.0635	0.0358806	15	13	2	2001
CNLT	China_Lantang	114.7	23.7	183.334	38.945	190.486	0.0734419	20	12	8	2001
CNCJ	China_Congjiangxiang	108.5	25.4	284.232	36.0292	217.015	0.0836702	16	0	16	2001
CNXI	China_Xiang	108.5	25.9	213.617	33.282	234.847	0.0905452	13	6	7	2001
CNLC	China_Lichahei	120	36.2	112.137	47.5313	92.1226	0.0355178	13	5	8	2001
CNST	China_Sutai	120.7	31.2	169.941	48.3701	176.459	0.0680335	14	5	9	2012
CNLA	China_Leanhua	115.8	27.4	173.73	42.0741	303.234	0.116912	17	13	4	2014
THJT	Thailand_JhomThong_ChiangMai	98.7	18.4	217.847	27.741	73.0671	0.028171	6	3	3	2010
THCD	Thailand_ChiangDao_ChiangMai	99	19.4	295.242	25.239	107.678	0.0415152	7	2	5	2010
THOK	Thailand_Om_Koi_ChiangMai	98.3	17.9	698.026	17.8575	199.337	0.0768543	6	3	3	2010
KPKO	Korea_Local	127.5	36.1	1600.47	22.0908	412.28	0.158954	9	7	2	2010
HRWB	Croatia_WildBoar	16	45.8	80.6579	58.8498	96.7288	0.0372937	16	8	8	2010	European_Wild
SBWB	South_Balkan_WildBoar	25.3	42.8	60.312	61.1373	199.641	0.0769715	20	13	7	2010
ITWB1	Italy_WildBoar	12.2	43.6	68.3335	50.4005	162.977	0.0628357	19	9	10	2010
ITWB2	Italy_Sardinia_WildBoar	9	40.1	71.6702	65.3024	129.972	0.0501107	20	14	6	2010
NEWB	NW_European_WildBoar	5.6	52.2	88.7751	43.8345	201.255	0.0775938	20	7	13	2010
IBWB	Iberian_WildBoar	-3.3	39.6	56.2674	58.6129	119.855	0.0462101	17	6	11	2010
PLWB	Poland_WildBoar	18.9	52.8	-	-	72.1307	0.02781	5	2	3	2010
FIWB	Finland_WildBoar	26.4	62.1	-	-	78.7442	0.0303598	5	2	3	2010
GRWB	Greece_Samos_WildBoar	27	37.7	-	-	128.993	0.0497333	7	6	1	2010
RUWB3	Russia_Wildboar_West	43.4	56.7	45.9111	67.3172	55.3853	0.0213538	20	14	6	2011
HUMA	Hungary_Mangalica	19.6	47	383.622	35.0357	561.413	0.216452	20	8	12	1998/2010	European_Domestic
ESIB	Spain_Iberian	-6.7	37.9	89.1054	63.1295	233.459	0.0900101	20	17	3	2000
ESMJ	Spain_Manchado_de_Jabugo	-6.7	37.9	-	-	203.168	0.0783315	6	4	2	1998
ITCS	Italy_Cinta_Senese	11.2	43.8	449.516	39.3139	320.352	0.123512	11	8	3	1998
ITMR	Italy_Mora_Romagnola	9.9	45.7	-	-	591.571	0.22808	8	3	5	1998
ITNS	Italy_Nera_Siciliana	13.4	37.3	161.535	43.1386	48.6029	0.0187388	15	10	5	1998
ITCA	Italy_Calabrese	17.4	40.7	538.473	31.5232	254.917	0.0982832	14	4	10	1998
ITCT	Italy_Casertana	11	43.9	357.96	35.8242	282.065	0.10875	14	7	7	1998
UKHS	UK_Hampshire	-1.3	51.1	415.74	50.2023	262.071	0.101041	20	10	10	1998
UKBK	UK_Berkshire	-1.3	51.5	361.801	55.0956	294.489	0.11354	20	9	11	1998/2010
UKGO	UK_Gloucester_Old_Spot	-2.1	51.8	503.756	55.7011	315.115	0.121492	20	11	9	1998
UKTA	UK_Tamworth	-1.7	52.6	493.281	52.7789	342.531	0.132063	20	9	11	1998
UKLB	UK_Large_Black	-3.8	50.8	243.74	56.2696	203.175	0.0783339	20	11	9	1998
UKBS	UK_British_Saddleback	-1.6	50.9	170.807	48.848	147.479	0.0568604	20	7	13	1998
UKBL	UK_British_Lop	-5	50.4	413.094	44.3704	226.647	0.0873838	10	7	3	1998
UKWE	UK_Welsh	-3.8	52.3	244.354	52.5134	126.015	0.048585	20	8	12	2010
SELI	Sweden_Linderoth	13.8	55.9	370.147	39.4888	238.584	0.0919859	15	8	7	1998
UKLE	UK_Leicoma	NA	NA	317.202	39.0257	172.304	0.0664317	11	9	2	1998
DEBB	Germany_Bunte_Bentheimer	7.9	52.4	360.976	41.9111	176.235	0.0679472	12	12	0	1998
DEAS	Germany_Angler_Sattleschwein	10.3	51.2	315.939	33.8288	104.346	0.0402304	10	5	5	1998
PTBI	Portugal_Bisaro	-8.6	39.7	216.721	39.1542	33.9247	0.0130797	14	9	5	1998
ESCM	Spain_Chato_Murciano	-1.1	38	280.454	49.8566	268.851	0.103656	20	5	15	2010
TRPR	Czech_Prestice	13.3	49.6	149.874	50.5492	59.6359	0.0229926	15	9	6	1998
PLPS	Poland_Pulawska_Spot	21	52.2	306.896	38.6021	56.5605	0.0218069	15	12	3	1998
CSPL	Pietrain-LargeWhite Synthetic	5.6	52.2	341.207	56.6932	184.884	0.0712818	20	13	7	2010
CSLM	LargeWhite-Meishan - F1	5.6	52.2	74.4934	60.3806	4.98142	0.00192059	20	20	0	1999
RUMS	Russia_Minisibs	82.9	55	388.899	39.6862	238.218	0.0918448	14	2	12	2012
BYPS	Belorussian_Pork_Swine	28.1	53.5	147.373	58.0147	51.0693	0.0196897	16	5	11	2013
UARW	Ukraine_Red_White_Belted	32	47	144.636	58.2803	88.0243	0.0339377	19	7	12	2010
UAPL	Ukraine_Poltava_Swine	34.6	49.6	195.177	48.4248	71.6533	0.0276259	13	0	13	2014
UAPS	Ukrainian_Pork_Swine	33.9	46.5	196.547	41.1924	40.6032	0.0156545	11	2	9	2010
UAMI	Ukraine_Mirgorod_Swine	33.6	50	193.835	47.8893	89.4268	0.0344785	13	0	13	2014
UASS	Ukrainian_Spotted_Steppe	33.9	46.5	-	-	133.076	0.0513074	7	3	4	2010
RUBR	Russia_Breitov	39.9	57.6	140.65	57.1164	64.9866	0.0250555	18	2	16	2007
RULV	Russia_Livni	36.1	53	142.841	58.5911	46.8566	0.0180655	16	0	16	2006
RUMR	Russia_Murom	40.4	56.1	194.374	47.8592	40.1156	0.0154665	12	0	12	2010
UAWS	Ukrainian_White_Steppe	33.9	46.5	194.745	54.8698	136.484	0.0526212	18	2	16	2010
RUUZ	Russia_Urzhum	49.7	58.6	-	-	211.165	0.0814146	9	7	2	2003
USFP	USA_FeralPig	-101.3	39.8	63.4073	61.0893	47.6421	0.0183684	20	11	9	2010	American_Feral
ARFP	Argentina_FeralPig	-57.2	-28.3	-	-	167.339	0.0645174	6	2	4	2009
BRMO	Brazil_Moura	-52	-27.2	-	-	151.962	0.0585888	9	3	6	2009	American_Domestic
CRCR	CostaRica_Creole	-85.4	10.5	171.877	35.7015	394.742	0.152193	12	8	4	2009
CUCR	Cuba_Creole	-83.7	22.4	170.199	46.9907	83.5706	0.0322206	12	4	8	2009
USOS	USA_Ossabaw	-81.1	31.7	-	-	179.953	0.0693807	6	0	6	2010
ARFO	Argentina_SemiFeral_Argentinian_FO	-58.2	-26.2	156.706	44.0212	94.4798	0.0364267	10	6	4	2009
ARCR	Argentina_Creole_Argentinian_MS	-54.4	-26.9	-	-	22.9445	0.00884623	9	7	2	2009
MXHL	Mexico_Pelon_hairless	-100.3	19.4	-	-	177.76	0.0685353	9	5	4	2009
MXCU	Mexico_Cuino	-104.9	21.8	-	-	158.391	0.0610676	6	2	4	2009
CUEA	Cuba_CubaEastPig	-76.6	20.4	-	-	20.7001	0.00798092	5	1	4	2009
BRPU	Brazil_Piau	-41.7	-12.6	-	-	182.603	0.0704025	9	2	7	2009
BRMT	Brazil_Monteiro	-56.6	-16.3	193.951	44.1999	75.1094	0.0289584	10	4	6	2009
GTCR	Guatemala_Creole_Guatemala	-90.4	-15.1	171.321	40.4653	38.2971	0.0147654	14	3	11	2009
PECR	Peru_Creole_Peru	-69.4	-16	142.61	42.1451	34.3462	0.0132422	16	10	6	2009
USYU	USA_YucatanMinipig	-86.1	40.3	643.603	40.3407	392.368	0.151277	10	10	0	2010
USGI	USA_Guinea_hog	-90	32.1	498.292	36.0377	288.202	0.111116	20	12	8	2010
USPC	USA_Poland_China	-80.2	25.8	-	-	148.855	0.0573911	6	6	0	2010
USSP	USA_Spot	NA	NA	-	-	115.556	0.0445526	9	9	0	2010
USHS	USA_Hampshire	-1.3	51.1	228.075	62.0952	171.83	0.0662489	20	11	9	2010
USMU	USA_Mulefoot	-90.9	29.8	708.66	39.1985	403.466	0.155556	20	7	13	2010
USBK	USA_Berkshire	-1.3	51.5	272.221	57.5103	229.396	0.0884436	20	14	6	2010
TNWB	Tunisia_WildBoar	9.6	34.1	-	-	145.769	0.0562013	7	7	0	2010	African_Feral
KEDP1	Kenya_1	37.9	0.5	-	-	51.3614	0.0198024	5	1	4	2010	African_Domestic
KEDP2	Kenya_2	37.9	0.5	-	-	64.0049	0.0246771	4	2	2	2010
AUFP	Australian_FeralPig	134.5	-24.8	211.547	39.0459	188.043	0.0724998	10	3	7	2010	Oceania_Feral
LDR1	Landrace_1	NA	NA	301.806	50.8521	223.372	0.086121	20	18	2	2010	Commercial_Breed(Landrace)
LDR2	Landrace_2	NA	NA	381.618	49.4081	198.958	0.076708	15	7	8	1998
LDR3	Landrace_3	NA	NA	338.75	42.8906	158.383	0.0610644	14	7	7	1998
LDR5	Landrace_5	NA	NA	184.635	61.6111	142.293	0.0548611	20	13	7	2010
LDR6	Landrace_6	NA	NA	196.482	54.2663	77.5894	0.0299146	20	0	20	2009
LDR7	Landrace_7	NA	NA	166.782	63.7515	149.568	0.0576659	20	17	3	2010
LDR4	Landrace_4	NA	NA	166.315	62.426	166.724	0.0642802	20	10	10	2001
LWT2	LargeWhite_2	NA	NA	148.307	58.9422	115.548	0.0445496	20	8	12	2001	Commercial_Breed(LargeWhite)
LWT1	LargeWhite_1	NA	NA	367.685	57.4976	211.838	0.0816741	16	16	0	2010
LWT3	LargeWhite_3	NA	NA	177.96	62.0713	161.829	0.0623933	20	12	8	2010
UKMW	UK_Middle_White	-1.4	54.2	314.87	57.049	238.776	0.0920599	20	8	12	1998
LWT4	LargeWhite_4	NA	NA	157.287	58.7119	125.138	0.0482468	20	19	1	2010
PIT1	Pietrain_1	NA	NA	258.737	53.676	197.528	0.0761569	20	12	8	2010	Commercial_Breed(Pietrain)
PIT2	Pietrain_2	NA	NA	191.245	58.1172	144.596	0.0557488	20	18	2	2010
PIT3	Pietrain_3	NA	NA	264.325	50.6511	116.3	0.0448394	18	8	10	1998
DUR1	Duroc_1	NA	NA	373.951	62.811	245.959	0.0948293	19	19	0	2010	Commercial_Breed(Duroc)
DUR2	Duroc_2	NA	NA	258.45	61.6558	230.31	0.0887961	20	15	5	2010
DUR3	Duroc_3	NA	NA	253.672	52.6646	202.237	0.0779725	20	17	3	2010
DUR4	Duroc_4	NA	NA	215.011	61.3151	233.089	0.0898675	20	8	12	2001
BABA	Babyrousa_babyrussa(outgroup)	NA	NA	-	-	NA	NA	4	3	1	2010	Outgroup_Suids
PHAF	Phacochoerus_africanus(outgroup)	NA	NA	-	-	NA	NA	8	7	1	2010
SBSB	Sus_barbatus(outgroup)	NA	NA	950.346	14.2619	NA	NA	11	6	5	2010
SCEL	Sus_celebensis(outgroup)	NA	NA	-	-	NA	NA	6	6	0	2010
SVSV	Sus_verrucosus(outgroup)	NA	NA	1457.23	20.2699	NA	NA	10	10	0	2010
