# Supplementary material for: Genome-wide SNP data unveils the globalization of domesticated pigs
Source: Genet Sel Evol. 2017 Sep 21;49:71. doi: 10.1186/s12711-017-0345-y (PMC5609043; doi:10.1186/s12711-017-0345-y)
Supplement: Supplementary file 2 — Additional file 2: Table S2. List of number of individuals and SNPs used in each step of analysis. [file 12711_2017_345_MOESM2_ESM.xlsx]

## Sheet: TableS2
Table S2 A list of number of individuals and SNPs used in each step of analysis
Stage	Analysis	Filter Criteria	Individual Sum	SNP Sum
Stage1	Preprocess, Merge and Rename		3482	61772
Stage2	1. Exclude breeds with less than 5 individuals. 2. Randomly remove one individual from all high related individual pairs with IBS>0.95. 3. Downsample breeds with more than 20 individuals by SNP call rate.		2,113 (2,074 Sus scrofa & 39 Outgroups)	61772
Stage3	Multi-dimensional scaling (MDS)	--mind 0.1 --maf 0.05 --geno 0.1 --indep-pairwise 50 10 0.2	2093	15427
	ADMIXTURE	--mind 0.1 --maf 0.05 --geno 0.1 --indep-pairwise 50 10 0.2	2,054 (No Outgroups)	14990
	Neighbor Joining Tree (NJtree)	--mind 0.1 --maf 0.05 --geno 0.1	2093	53799
	Runs of Homozygosity (ROH)	--mind 0.1 --maf 0.01 --geno 0.1	2093	55072
	LD Decay (r2=0.3Kb)	--mind 0.1 --maf 0.01 --geno 0.1 --extract AS_EU.txt --exclude snp_pos0.txt	2093	13284
	Effective Population Size (Ne)	--mind 0.1 --maf 0.01 --geno 0.1 --extract AS-EU.txt --exclude snp_pos0.txt	2093	13284
	Haplotype Diversity (Shapeit)	--mind 0.1 --maf 0.01 --geno 0.1 --indep-pairwise 50 10 0.1	2,054 (No Outgroups)	7811
	Fst betweeen wild boar and domestic pigs	--mind 0.1 --geno 0.1 --maf 0.05, individuals inferred to contain more than 90% Asian or European ancestry	782	42808
